# Supplementary material for: Defect Engineering and Anisotropic Modulation of Ionic Transport in Perovskite Solid Electrolyte LixLa(1−x)/3NbO3
Source: MDPI journal article supplement (doi:10.3390/molecules26123559), 2021-06-10
Supplement: s1 [file s1]

# Defect Engineering and Anisotropic Modulation of Ionic Transport in Perovskite Solid Electrolyte $\text{Li}_x\text{La}_{(1-x)/3}\text{NbO}_3$

Jinhua Hong <sup>1</sup>, Shunsuke Kobayashi <sup>1</sup>, Akihide Kuwabara <sup>1</sup>, Yumi H. Ikuhara <sup>1</sup>, Yasuyuki Fujiwara <sup>2</sup> and Yuichi Ikuhara <sup>1,3,\*</sup>

<sup>1</sup> Nanostructures Research Laboratory, Japan Fine Ceramics Center, Nagoya 456-8587, Japan, jinhuahong436@gmail.com (J.H.); s\_kobayashi@jfcc.or.jp (S.K.); kuwabara@jfcc.or.jp (A.K.); yumi@jfcc.or.jp (Y.H.I.)

<sup>2</sup> Faculty of Engineering, Shinshu University, Nagano 380-8553, Japan, yamato2010@shinshu-u.ac.jp

<sup>3</sup> Institute of Engineering Innovation, The University of Tokyo, Tokyo 113-8586, Japan

\* Correspondence: ikuhara@sigma.t.u-tokyo.ac.jp

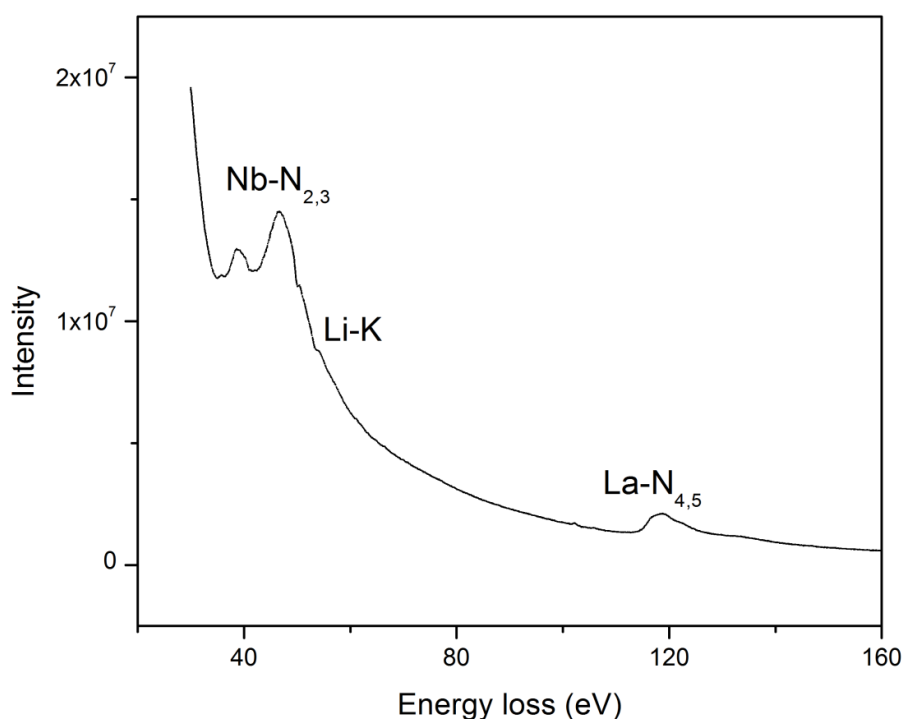

Figure S1. Core-level EELS of solid electrolyte LLNO to show the low content of Li.

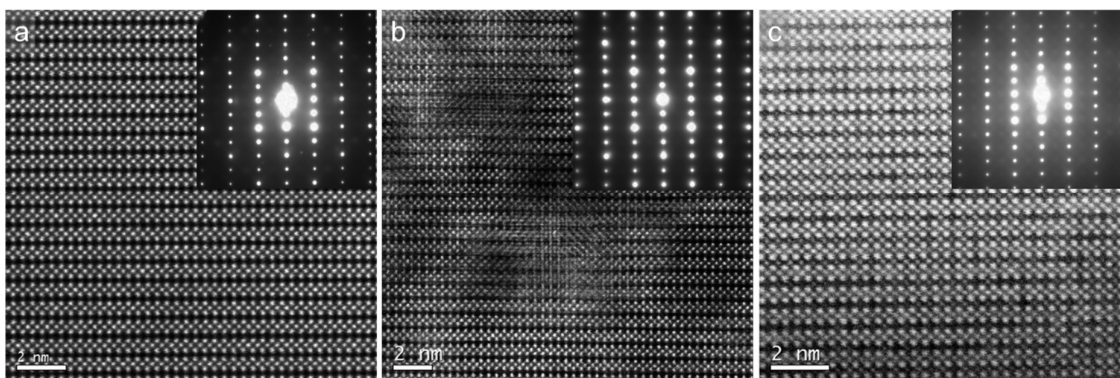

**Figure S2.** Atomically-resolved HAADF images of electrolytes quenched at different temperatures. (a) pristine non-quenched and 700°C-quenched. (b) 1000°C-quenched. (c) 1300°C-quenched. The corresponding diffraction patterns show no obvious changes except the spot intensity, while the dark patterned spot arrays in 1300°C-quenched indicate the emerging of a ordered metastable structure.

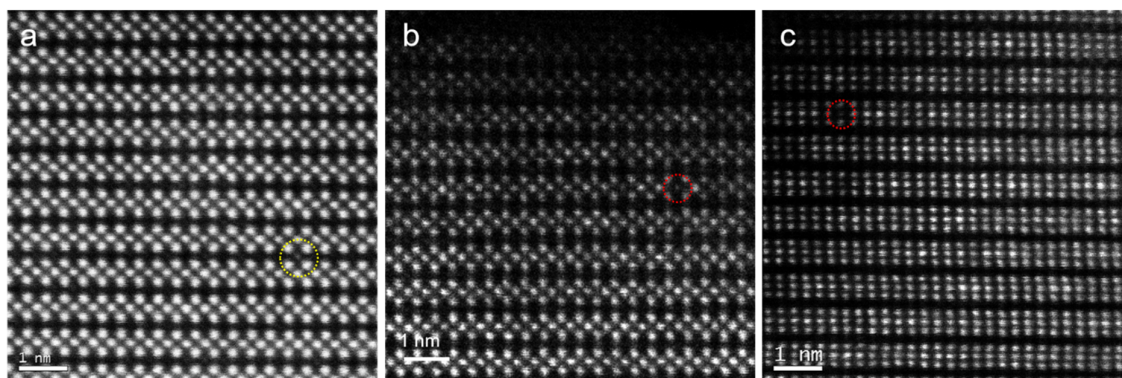

**Figure S3.** Atomically-resolved HAADF images of 700°C-quenched electrolytes along [100] direction (a,b) and [110] direction (c). Yellow and red circles indicate La interstitials and vacancies, respectively.

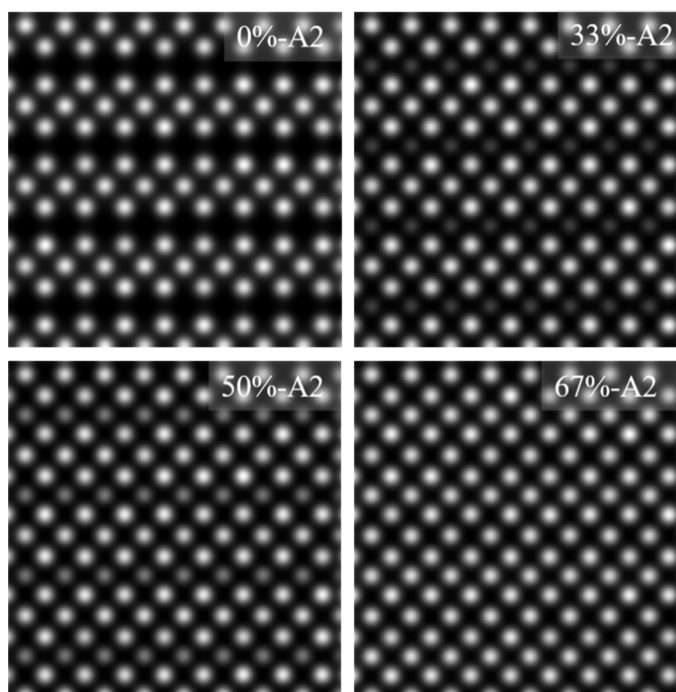

**Figure S4.** Simulated HAADF image of LLNO electrolytes along [100] direction with different  $\text{La}_{\text{A2}}$  occupancies. Note that 0% occupancy in A2 layer corresponds to the perfect lattice, and the La occupancy in A1 layer in the perfect crystal is 67% and the left 33% are vacancy sites to accommodate Li ions. All these simulations are based on the structures in which  $\text{La}_{\text{A1}}$  occupancy keep as a constant (67%) and  $\text{La}_{\text{A2}}$  occupancy changes.

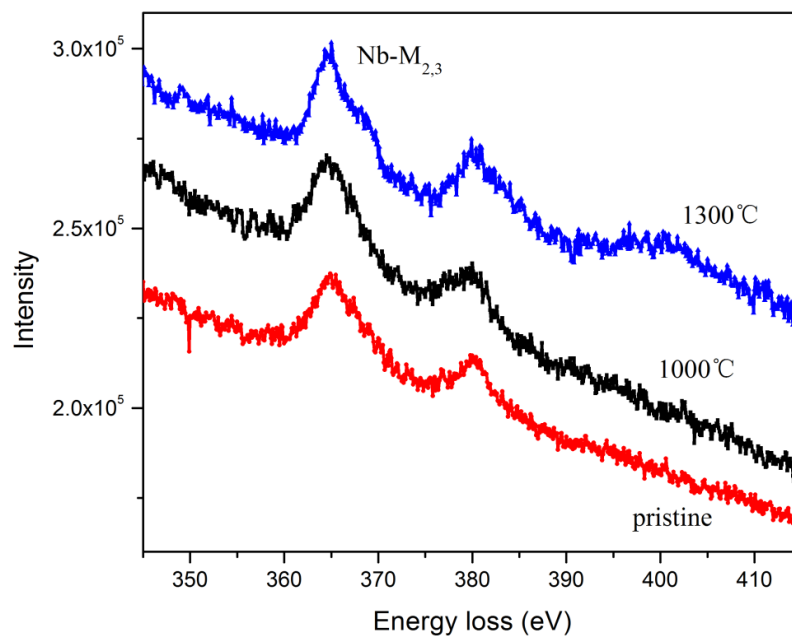

**Figure S5.** EELS-ELNES of Nb in solid electrolyte LLNO quenched at different temperatures. The intensities of Nb-M<sub>2</sub> at 375eV and Nb-M<sub>1</sub> at 400eV increase with the quenching temperature, resulted from the more coordinated Nb after the atom rearrangement at high temperature.
